# Genetic Deletion of TrpV1 and TrpA1 Does not Alter Avoidance of or Patterns of Brainstem Activation to Citric Acid in Mice

Tian Yu<sup>1</sup>

Courtney E. Wilson<sup>1</sup>

Jennifer M. Stratford<sup>2</sup>

Thomas E Finger<sup>1</sup>

<sup>1</sup>Rocky Mountain Taste & Smell Center, Department of Cell and Developmental Biology,  
University of Colorado School of Medicine, Aurora, CO 80045

<sup>2</sup> Department of Psychology and Neuroscience, University of Colorado Boulder, Boulder,  
CO 80309-0345

Correspondence should be direct to: [Tom.Finger@CUAnschutz.edu](mailto:Tom.Finger@CUAnschutz.edu)

1 ABSTRACT:

2 Exposure of the oral cavity to acidic solutions evokes not only a sensation of sour, but also of  
3 sharp or tangy. Acidic substances potentially stimulate both taste buds and acid-sensitive  
4 mucosal free nerve endings. Mice lacking taste function (P2X2/P2X3 double-KO mice) refuse  
5 acidic solutions similarly to wildtype mice and intraoral infusion of acidic solutions in these KO  
6 animals evokes substantial c-Fos activity within orosensory trigeminal nuclei as well as of the  
7 nucleus of the solitary tract (nTS) (Stratford et. al 2017). This residual acid-evoked, non-taste  
8 activity includes areas that receive inputs from trigeminal and glossopharyngeal peptidergic  
9 (CGRP-containing) nerve fibers that express TrpA1 and TrpV1 both of which are activated by  
10 low pH. We compared avoidance responses in wildtype (WT) and TrpA1/V1 double KO  
11 (TRPA1/V1<sup>Db1/-</sup>) mice in brief-access behavioral assay (lickometer) to 1, 3, 10, 30 mM citric  
12 acid, along with 100  $\mu$ M SC45647 and H<sub>2</sub>O. Both WT and TRPA1/V1<sup>Db1/-</sup> show similar  
13 avoidance, including to higher concentrations of citric acid (10 and 30 mM; pH 2.62 and pH 2.36  
14 respectively), indicating that neither TrpA1 nor TrpV1 is necessary for the acid avoidance  
15 behavior in animals with an intact taste system. Similarly, induction of c-Fos in the nTS and  
16 dorsomedial spinal trigeminal nucleus was similar in the WT and TRPA1/V1<sup>Db1/-</sup> animals.  
17 Taken together these results suggest non-TrpV1 and non-TrpA1 receptors underlie the residual  
18 responses to acids in mice lacking taste function.

19

20 **Keywords:** taste bud, trigeminal, solitary nucleus, sour, c-fos, irritation

21

## 22 INTRODUCTION

23           When acidic solutions (e.g. lemon juice) are taken into the mouth, we describe the  
24 resulting perception as “sour” and consider it to be an aversive basic taste. However, the  
25 sensations arising from acidic substances in the oral cavity are a compound sensation of sour (a  
26 taste originating from taste buds) and direct activation of acid-sensitive general mucosal afferents  
27 of the oropharynx including the trigeminal, glossopharyngeal and superior laryngeal nerves.  
28 Indeed, a dictionary definition of sour ([thefreedictionary.com](http://thefreedictionary.com)) includes descriptors such ‘sharp,’  
29 ‘tart’, or ‘tangy’ which are not taste modalities, but rather chemesthetic ones corresponding to  
30 activation of acid-sensitive mucosal nerves likely including polymodal nociceptors. Thus,  
31 aversion to acidic solutions might be due to activation of these nociceptors rather than of the  
32 taste system alone.

33           In mice lacking a functional taste system (P2X2/3-dbl-KO mice), the chorda tympani  
34 nerve, which is a pure taste nerve, shows no responses to any tastants including acids (Finger,  
35 Danilova et al. 2005). Consistent with this, these mice show no preference for sweeteners or  
36 avoidance of bitter substances in brief-access taste tests. Despite the apparent lack of taste  
37 responses to acids, the P2X2/3-dbl-KO mice do exhibit normal avoidance of citric acid in similar  
38 brief access tests (Hallock, Tatangelo et al. 2009). This avoidance may be mediated not by taste,  
39 which is non-functional in these mice, but by acid-responsive fibers in the trigeminal,  
40 glossopharyngeal or laryngeal nerves which do show residual low level activity in the P2X2/3-  
41 dbl-KO mice (Ohkuri, Horio et al. 2012).

42           Polymodal nociceptors respond to acidification as well as other potentially painful stimuli  
43 (Bessou and Perl 1969). Many small caliber polymodal nociceptors that innervate the oral cavity  
44 (Kichko, Neuhuber et al. 2018, Wu, Arris et al. 2018) express one or both of the pH-sensitive

45 transient receptor potential (Trp) channels, TrpA1 (Wang, Chang et al. 2011) and TrpV1  
46 (Tominaga, Caterina et al. 1998). TrpA1 has been implicated especially in responsiveness to  
47 weak acids capable of penetrating cell membranes to produce intracellular acidification (Wang,  
48 Chang et al. 2011). TrpV1 is implicated in responses of the glossopharyngeal and vagus nerves  
49 to acidification of the oral and pharyngeal epithelium (Arai, Ohkuri et al. 2010). Gating of either  
50 of these channels by acids can directly activate the nociceptive fiber resulting in a noxious  
51 sensation suitable for driving avoidance behavior. Ablation of the ganglion cells expressing  
52 TrpV1 in mice lacking sour taste receptors does result in loss of acid-avoidance behavior (Zhang,  
53 Jin et al. 2019) but it is not clear whether this is due to loss of TrpV1 itself or other ion-sensing  
54 mechanisms of these neurons. Peptidergic polymodal nociceptor fibers, most of which express  
55 one or both of TrpV1 and TrpA1 (Bae, Oh et al. 2004, Nguyen, Wu et al. 2017, Kim, Kim et al.  
56 2018), terminate centrally in both the lateral portion of the nuc. solitary tract (nTS) as well as in  
57 adjacent trigeminal brainstem nuclei including the dorsomedial trigeminal nucleus (DMSp5)  
58 (Corson, Aldridge et al. 2012, Stratford, Thompson et al. 2017). We tested whether genetic  
59 deletion of both TrpA1 and TrpV1 affected either acid-induced avoidance behaviors or the  
60 pattern of neuronal activation in the nTS or adjacent DMSp5.

61

62

63

## 64 **Materials and Methods**

### 65 **Animals**

66 TrpA1V1-double KO mice, on a C57BL6 background (TRPA1/V1<sup>Db1/-</sup>) were a generous  
67 gifts from Diana Bautista, University of California Berkeley (Gerhold and Bautista 2008). In  
68 these mice, deletion of TrpA1 had been accomplished by elimination of residues 901–951  
69 including most of exon 23 – a region encoding the putative pore and part of the sixth  
70 transmembrane domain (Bautista, Jordt et al. 2006). The VR1 gene was disrupted (Caterina,  
71 Leffler et al. 2000) by deleting part of the fifth and all of the sixth putative transmembrane  
72 domains, together with the intervening pore-loop region. C57BL6/J mice were purchased from  
73 The Jackson Laboratory (Bar Harbor, ME). For brief access lickometer behavioral assays, 4-6  
74 months old male TRPA1/V1<sup>Db1/-</sup> mice (n=7) and 10 month old male C57BL6/J mice (n=3) were  
75 used. For immunohistochemical staining, we used both male and female mice: TRPA1/V1<sup>Db1/-</sup>  
76 (2 to 8 mo, n=10); C57BL6/J mice (4 to 7 mo, n=8). In an addition to the C57 cases, we utilized  
77 mice of the line B6.Cg-Tg(Fos-tTA,Fos-EGFP\*)1Mmay/J which carry 2 transgenes associated  
78 with c-Fos: cfos-tTA and cfos-shEGFP. In these mice, on a C57BL6/J background, the randomly  
79 inserted transgenes utilize the c-Fos promotor to drive expression of respectively tTA and a  
80 short-lived (two-hour half-life) GFP. We did not find close correlation between GFP expression  
81 and c-Fos immunostaining and so the GFP results were ignored in our analysis. Further, the c-  
82 Fos immunostaining counts from these animals were entirely consistent with those obtained from  
83 the wildtype C57BL6/J mice and so were included in those results.

84

85 All animal procedures were performed in accordance with NIH guidelines and were approved by  
86 the Institutional Animal Care and Use Committee at the University of Colorado School of  
87 Medicine.

88

### 89 **Brief access preference tests**

90 Davis Rig Lickometers (MS-160; Dilog Instruments and Systems) were used for training  
91 and brief-access testing of mice. The animals underwent a 4-day water training before acid  
92 testing. Mice were placed on water deprivation 20-23 hours before the first day of training or  
93 acid testing. No extra water was given after the training and testing days. On the first day of the  
94 4-day training, water-deprived animals were allowed access to a single water spout for a 30-min  
95 period. In the following three days of water training, 2-4 bottles of water were given in random  
96 sequences for 15 min. Mice had 5 seconds to lick at each spout after their first lick before the  
97 door closed and the bottle was switched to the next position with an inter-trial interval of 7.5 s.  
98 The mice were considered well-trained if they lick more than 30 times consistently during each  
99 trial for the first 15 trials.

100 For the acid testing days, six bottles of tastants including 4 concentrations of acetic or  
101 citric acid (1 mM, 3 mM, 10 mM and 30 mM), 1 concentration of artificial sweetener SC45647  
102 (100  $\mu$ M) and H<sub>2</sub>O were presented in a testing block with a set up similar to the training session.  
103 Testing periods lasted for 15 min, with the opportunity for the mice to sample from the 6  
104 solutions a total of 30 times. Licks were measured using InstaCal software. Each block of 6  
105 tastant trials featured each solution in random order. Only data from completed blocks were used  
106 in the calculation of preference. Preference was calculated by averaging the licks per tastant  
107 block of each solution relative to those for water (i.e., a 'lick ratio'). The same mice that were

108 assessed for citric acid preference were then tested for acetic acid preference again with the same  
109 paradigm. The solutions used in acetic acid testing were as follows: 100 $\mu$ M SC45647, H<sub>2</sub>O, 1, 3,  
110 10 and 30mM acetic acid. Testing for each series of tastants was repeated at least twice. Because  
111 there was no statistically significant difference in licking across each testing day for each mouse  
112 [F(1,2) = 0.42, p = 0.66], the number of licks for each tastant were averages across these testing  
113 days for each mouse.

114

### 115 **Citric acid stimulation for c-Fos via intraoral cannula**

116 Both bilateral intraoral cannulae implantation and stimulation methods were adopted  
117 from (Stratford and Thompson 2016). Briefly, mice were anesthetized with an intramuscular  
118 injection of a combination of medetomidine hydrochloride (Domitor; 0.4 mg/kg; Pfizer) and  
119 ketamine hydrochloride (40 mg/kg; Bioniche Pharma). Intraoral cannulae were inserted via a  
120 midline incision immediately caudal to the pinnae. Then a sterile 2-3 cm stainless steel needle  
121 (19 gauge; Hamilton) with a flared end polyethylene tube (50 gauge; Becton Dickinson) was  
122 inserted from behind the pinna and guided subcutaneously into the oral cavity, lateral to the first  
123 maxillary molar. The needle was then withdrawn, leaving the polyethylene cannula and washer  
124 in place in the rear of the oral cavity. These mice were given 4 days for recovery prior to  
125 training.

126 For training and testing, liquids were delivered into intraoral cannula via a 5-cc syringe  
127 connected to a syringe pump (Model R99-E, Razel Scientific Instruments). To train the mice for  
128 the acclimation of liquid stimulation through the cannulae, they were water deprived for 23 hour  
129 / day, and given 3 ml of deionized water through one of the two intraoral cannulae over the  
130 course of 30 min. We trained all the mice with deionized water for 2 days followed by

131 stimulation with either deionized water (n=4 [all M] for C57BL6/J; n=5 [2 F, 3 M] for  
132 TRPA1/V1<sup>Db1-/-</sup>) or 30 mM citric acid (n=4 [1 F, 3 M] for C57BL6/J; n=5 [1F, 4M] for  
133 TRPA1/V1<sup>Db1-/-</sup>). Animals exposed to the stimulus were left undisturbed for an additional 45 min  
134 prior to sacrifice.

135

### 136 **c-Fos immunohistochemistry**

137         Seventy-five minutes after onset of taste stimulation through cannula, animals were  
138 deeply anesthetized with Fatal-Plus® (50 mg/kg intraperitoneally; MWI), and then perfused  
139 transcardially with saline followed by 4% paraformaldehyde (PFA) in 0.1 M pH 7.2 phosphate  
140 buffer (PB). The brains were post fixed for 3 hours at room temperature, and then cryoprotected  
141 overnight in 20% sucrose in PB at 4 °C. After cryoprotection, brainstems were cut and embedded  
142 in OCT, frozen and sectioned at 40 µm using a cryostat. Free-floating sections were collected in  
143 PBS.

144         For immunostaining, sections were washed in PBS 3 times and then processed for antigen  
145 retrieval in sodium citrate (pH 6) at 85 °C for 10 min. After tissues cooled, non-specific protein  
146 binding was blocked in a medium consisting of 2% normal donkey serum (Jackson  
147 ImmunoResearch) in antibody medium (AB medium: 0.3% TritonX100, 0.15 M NaCl, and 1%  
148 BSA in PB) for 1 hour at room temperature.

149         We utilized Mouse c-Fos antibody (1:1000, PhosphoSolutions; Cat#: 309-cFos; RRID  
150 RRID:AB\_2632380; Lot#: GS117P) and Rabbit P2X2 antibody (1:1000, Alomone Labs;  
151 Cat#:APR003; RRID AB\_2040054; Lot# APR003AN1002). These antibodies were diluted in  
152 AB medium accordingly and were used to incubate the sections for 4 days at 4 °C. After 3 10-  
153 min washes in PBS, sections were transferred to secondary antibody cocktail (Alexa Fluor 568



154 donkey anti mouse, 1:500; Alexa Fluor 488 donkey anti rabbit, 1:500; NeuroTrace Nissl  
155 640/660, 1:500; all from Life Technologies) for 2-hour incubation at room temperature.  
156 Following another 3 10-min washes in PBS, free-floating tissue sections were mounted onto  
157 Microscope Slides (Tanner scientific, #TNR WHT90AD), and then coverslipped using  
158 Fluoromount-G (Southern Biotech).

159       According to the manufacturer's data sheet, the PhosphoSolutions Mouse c-Fos antibody  
160 shows a broad band of reactivity in Western blots of HeLa cells centered at 50kDa. We tested  
161 whether this antibody stains similarly in fixed mouse brain tissues by comparing  
162 immunoreactivity of this antibody to the one we have utilized previously: we allowed a wildtype  
163 mouse to drink 150mM MSG for 30min and perfused the mouse with 4% buffered  
164 paraformaldehyde after an additional 45 mins. The olfactory bulb & brainstem were removed,  
165 cryoprotected in 20% sucrose and frozen free-floating sections were cut at 40um. Representative  
166 sections were incubated in sodium citrate buffer pH6 at 85 °C for 10min. After cooling to RT for  
167 20min, the sections were rinsed 3 X 5min in PBS, then incubated with 2%NDS+AB media for  
168 1hr at RT. The free-floating sections then were incubated with a mixture of primary antibodies:  
169 rabbit a-cFos (lot.D00148958) 1:500 / mouse a-cFos (lot. GS418y) 1:1000 for 4 nights at 4 °C.  
170 After 3 X 10min rinses in PBS, sections were incubated with a mixture of secondary antibodies:  
171 A488 donkey-a-rabbit 1:500/ A568 donkey-a-mouse 1:500/ Nissl 1:500 for 2hrs at RT. The  
172 sections then were rinsed in PBS followed by 0.05M PB prior to coverslipping. The distribution  
173 of labeled cells within and around the nTS was similar to that observed in single label cases and  
174 nearly all cells were labeled by both antibodies. To quantitatively analyze the degree of co-  
175 localization, we counted cells labeled by one or both antibodies in the olfactory bulb where the  
176 density of labeled cells permits quantitative assessment. In randomly selected fields through the

177 granule cells layer of 3 sections, we counted the number of single and double-label cells. Of 153  
178 labeled cells, 149 were double-labeled; 4 were labeled by only the PhosphoSolutions antiserum  
179 and none were labeled only by the rabbit antibody. We conclude that the 2 antibodies label  
180 nearly identical populations and that results from the PhosphoSolutions antibody should be  
181 comparable to those obtained previously with the rabbit antibody.

182

### 183 **c-Fos activity determination**

184 Brainstem sections were observed under an Olympus BX41 microscope. Representative  
185 levels (r1, r2, r3, r4, i1, i2) of the nucleus of the solitary tract (nTS) were decided under a 10X  
186 magnification objective according to Stratford et al. (Stratford, Thompson et al. 2017) and  
187 photographed at 20X magnification using CellSense software with a XM10 camera. Boundaries  
188 of the nTS were drawn using P2X2 and Nissl staining as reference and according to Stratford et  
189 al. 2017 in ImageJ. Boundaries of the DMSp5 were not distinct based on the images but the  
190 approximate boundaries were drawn using nTS boundaries and other brainstem nuclei as  
191 reference (Corson, Aldridge et al. 2012). The DMSp5 was taken as the area between the lateral  
192 edge of nTS and the spinal trigeminal nucleus.

193 The area of nTS was further divided into 6 parts following the system described in  
194 Stratford et al (Stratford and Finger 2011) using a horizontal line dividing the area into dorsal  
195 and ventral tiers and two vertical lines dividing the medial-lateral extent into thirds. The six parts  
196 of nTS were named DM, DI, DL, VM, VI, VL, and the cFos signals in these areas as well as  
197 DMSp5 were counted using ImageJ Cell counter plugin. The identity, stimulus and genotype of  
198 all cases were blinded to the person performing the cell counts.

199

## 200 **Statistical Analysis**

201 Behavioral data are presented as group means with individual data points indicated.  
202 Immunohistochemical data are presented as group means  $\pm$  SEM. Data were analyzed using  
203 appropriate two- and three-way analysis of variance (ANOVA)s (Statistica; StatSoft, Tulsa, OK).  
204 Tukey's honest significant difference tests were used to assess statistically significant ( $p < 0.05$ )  
205 main effects or interactions (see Results for details).

206

## 207 **RESULTS**

### 208 **Behavioral Assessment**

209 The overall preference curves for both WT and TRPA1/V1<sup>Db1-/-</sup> animals appeared nearly  
210 identical with significant aversion at 3mM but not significant aversion at 1mM concentration of  
211 citric acid (Fig. 1). For the acetic acid experiments, behavioral preferences were statistically  
212 different across different acetic acid concentrations,  $[F(5,10) = 26.82, p < 0.001]$ . In particular,  
213 the preference for 10 mM and 30 mM acetic acid were significantly lower than the preferences  
214 for water, 1 mM and 3 mM acetic acid (all  $p$ 's  $< 0.05$ ). Also, the preference for 100 $\mu$ M SC45647  
215 was significantly higher than the preference for all other tastants (all  $p$ 's  $< 0.05$ ). Moreover,  
216 overall, there was no statistical differences in the behavioral preference for the acetic acid  
217 concentrations tested between WT and TrpA1/V1<sup>Db1-/-</sup> animals,  $F(5,50) = 1.75, p = 0.14$ . For  
218 citric acid experiments, behavioral preferences were statistically different between different taste  
219 solutions,  $F(5, 15) = 111.83, p < 0.0001$ , with the amount of licking to 3, 10 and 30 mM citric  
220 acid being significantly lower than to that of 1 mM citric acid and water (all ' $p$ 's  $< 0.05$ ).  
221 However, there were no statistically significant differences between Trp channel knockouts and  
222 controls for any tastant,  $F(5,75) = 1.25, p = 0.30$ .

223

## 224 **c-Fos Induction**

225           Injection of 30 mM citric acid in the mouth via intraoral cannulae reliably induced c-Fos  
226 within particular regions of the nTS as compared to similar injection of water. As calculated  
227 previously, raw counts of c-Fos positive neurons in sub-compartments of the nTS were compared  
228 between water-stimulated and citric acid-stimulated animals to produce a measure of citric acid-  
229 specific c-Fos induction. In our previous study (Stratford, Thompson et al. 2017), acid-induced  
230 c-Fos was highest in the central portion of rostral-intermediate nTS (r3-i2) and in ventrolateral  
231 subdivisions in intermediate nTS (i1-i3). These regions did not show such activation in the  
232 P2X2/P2X3 dbl KO mice which lack taste function. However, in P2X2/P2X3 dbl KO animals,  
233 significant levels of activation to citric acid did remain in the DMSp5, which receives substantial  
234 input from polymodal nociceptor (CGRP+) fibers of the trigeminal and glossopharyngeal nerves.  
235 Accordingly, we especially focused on possible changes in c-Fos activation in this trigeminal-  
236 recipient area.

237           Fig. 2 shows a representative image of c-Fos activation in relation to the lateral nTS and  
238 the DMSp5 of WT and TRPA1/V1<sup>Db1-/-</sup> mice following stimulation with citric acid. The number  
239 of c-Fos positive cells was significantly greater with citric acid stimulation than water  
240 stimulation,  $F(1, 5) = 49.53$ ,  $p < 0.05$ . However, there was no statistical difference in the number  
241 of c-Fos positive cells between WT and TRPA1/V1<sup>Db1-/-</sup> mice for either water or citric acid,  $F(1,$   
242  $82) = 0.05$ ,  $p = 0.83$ .

243           As shown in Fig. 3, the amount of citric acid-specific c-Fos was significantly different  
244 between nTS subregions and levels regardless of genotype,  $F(25, 210) = 4.24$ ,  $p < 0.001$ . In  
245 particular, citric acid evoked significant activity in the central subregion of rostromedial

246 nTS (r2-i2), in the lateral subregion of intermediate nTS (i1-2) and in the DMSp5 of both WT  
247 and TRPA1/V1<sup>Db1-/-</sup> mice as compared to all other nTS subregions (all p's < 0.05). This pattern is  
248 similar to that reported previously for the mixed background (Ola-C57/BL6) controls in the  
249 previous study (Stratford, Thompson et al. 2017).

250 Moreover, the TRPA1/V1<sup>Db1-/-</sup> mice show overall levels of acid-induced c-Fos similar to  
251 the WT controls in all nTS subregions,  $F(25, 210) = 0.87$ ,  $p = 0.65$ , (average difference 0.06  
252 cells/compartments  $\pm 0.64$  SEM.; 95% C.I. -1.32 -1.20). Likewise, the TRPA1/V1<sup>Db1-/-</sup> mice show  
253 similar levels of acid-induced c-Fos in DMSp5 compared to WT controls,  $F(5, 25) = 0.31$ ,  $p =$   
254  $0.91$  (average difference 0.32 cells/region  $\pm 0.89$  SEM.; 95% C.I. -1.42-2.06).

255 In summary, the TRPA1/V1<sup>Db1-/-</sup> mice show no differences in the pattern of neural  
256 activation by citric acid compared to the WT animals. This suggests that neither TrpA1 nor  
257 TrpV1 play a significant role in detection and avoidance of 30 mM concentrations of citric acid,  
258 although this concentration is readily avoided by both TRPA1/V1<sup>Db1-/-</sup> and WT animals.

259

## 260 DISCUSSION

261 Acidity is the underlying chemical feature of sour substances. When acids are taken into  
262 the mouth, they stimulate sour-sensitive taste cells which depolarize, then release  
263 neurotransmitter to activate the taste fibers innervating them. This signaling between taste cells  
264 and nerve fibers requires functional P2X2 and P2X3 receptors; genetic deletion or  
265 pharmacological blockage of these receptors essentially eliminates taste-mediated neural activity  
266 (Finger, Danilova et al. 2005, Vandenbeuch, Anderson et al. 2013). Similarly, taste driven  
267 acceptance of sweet and umami, and taste driven avoidance of bitter is lost in mice lacking  
268 functional P2X2 and P2X3 receptors. In contrast, behavioral avoidance of intraoral acids remains

269 intact despite the loss of taste-related neural activity to these stimuli. Similarly, avoidance of  
270 acids persists even after genetic deletion of Otop1, the ion channel receptor for H<sup>+</sup> underlying  
271 sour detection (Zhang, Jin et al. 2019). These findings strongly suggest that not just taste, but  
272 another sensory modality drives the avoidance of acids in this context.

273         The oropharynx is innervated by chemically-sensitive free nerve endings arising from the  
274 trigeminal, glossopharyngeal and vagus nerves. These nerves include populations of polymodal  
275 nociceptors that express acid-sensitive ion channels including TrpA1 and TrpV1 (Tominaga,  
276 Caterina et al. 1998, Wang, Chang et al. 2011), and the TrpV1-expressing fibers are necessary  
277 for non-taste mediated avoidance of citric acid (Zhang, Jin et al. 2019). Yet these studies do not  
278 demonstrate that TrpV1 itself is the necessary receptor. It is likely that other acid-sensitive  
279 channels and receptors exist in these TrpV1-expressing fibers. Further, TrpV1 fully activates at a  
280 pH around 5 at body temperature (Tominaga, Caterina et al. 1998), whereas avoidance of citric  
281 acid begins at a pH near 3. It is likely that the tissue overlying the TrpV1 sensory terminals  
282 provides some buffering of acids applied to the surface of the epithelium, but weak acids, such as  
283 citric acid, effectively acidify the epithelium deep into the tissue (Richter, Caicedo et al. 2003),  
284 well beyond the region in which the nerve terminals lie. Taken together, these results suggest  
285 that TrpV1 itself may not be entirely responsible for responses to citric acid. Accordingly, we  
286 tested whether either TrpV1 or TrpA1 channels contribute to either the behavioral avoidance  
287 response, or the activation of brainstem neurons by citric acid. We found that neither the  
288 behavior nor the pattern and degree of neural activation was altered by genetic deletion of these  
289 channels.

290         If neither TrpV1 nor TrpA1 channels underlie avoidance of acidic substances in the  
291 absence of taste, what other mechanisms might be responsible? Likely candidates are one or

292 more members of the ASIC (acid sensing ion channel) family. Ion channels in this family are  
293 gated by decreases in extracellular pH. While many members of this family open at pH values  
294 near 7, others activate at lower pH values (Deval, Gasull et al. 2010). In particular, ASIC3 is  
295 expressed widely in polymodal nociceptors and plays a role in responses to pH5.0 (Price,  
296 McIlwrath et al. 2001). Further, amiloride, a non-specific blocker of ASIC channels, decreases  
297 the irritation of citric acid (albeit at a much higher concentration) measured psychophysically  
298 (Dessirier, O'Mahony et al. 2000), supporting the role of ASICs in this response. Conversely,  
299 inclusion of amiloride, a blocker of ASICs, in orally-applied solutions in rats neither decreased  
300 the trigeminal response to citric acid nor attenuated acid-induced c-Fos in brainstem trigeminal  
301 nuclei (Sudo, Sudo et al. 2003). Whether ASICs or some other acid-responsive mechanisms play  
302 a role in non-gustatory behavioral avoidance of weak acids then is unresolved.

303

#### 304 **CONFLICTS OF INTEREST**

305 The authors declare no conflicts of interest in relation to this work.

306

#### 307 **FUNDING**

308 This work was supported by a grant from the National Institute on Deafness and Other  
309 Communication Disorders (NIDCD) of the National Institutes of Health [grant number RO1  
310 DC012931 to T.E.F.].

311

#### 312 **ACKNOWLEDGEMENTS:**

313 The authors thank Dianna Bautista (U.C. Berkeley) for supplying the TrpV1/TrpA1 double KO  
314 mice and Mei Li for histological preparations and for comparison of antibody staining properties.

315 **REFERENCES**

316

- 317 Arai, T., T. Ohkuri, K. Yasumatsu, T. Kaga and Y. Ninomiya (2010). "The role of transient  
318 receptor potential vanilloid-1 on neural responses to acids by the chorda tympani,  
319 glossopharyngeal and superior laryngeal nerves in mice." *Neuroscience* **165**(4): 1476-1489.
- 320 Bae, Y. C., J. M. Oh, S. J. Hwang, Y. Shigenaga and J. G. Valtchanoff (2004). "Expression of  
321 vanilloid receptor TRPV1 in the rat trigeminal sensory nuclei." *J Comp Neurol* **478**(1): 62-71.
- 322 Bautista, D. M., S. E. Jordt, T. Nikai, P. R. Tsuruda, A. J. Read, J. Poblete, E. N. Yamoah, A. I.  
323 Basbaum and D. Julius (2006). "TRPA1 mediates the inflammatory actions of environmental  
324 irritants and proalgesic agents." *Cell* **124**(6): 1269-1282.
- 325 Bessou, P. and E. R. Perl (1969). "Response of cutaneous sensory units with unmyelinated fibers  
326 to noxious stimuli." *J Neurophysiol* **32**(6): 1025-1043. .
- 327 Caterina, M. J., A. Leffler, A. B. Malmberg, W. J. Martin, J. Trafton, K. R. Petersen-Zeitz, M.  
328 Koltzenburg, A. I. Basbaum and D. Julius (2000). "Impaired nociception and pain sensation in  
329 mice lacking the capsaicin receptor." *Science* **288**(5464): 306-313.
- 330 Corson, J., A. Aldridge, K. Wilmoth and A. Erisir (2012). "A survey of oral cavity afferents to  
331 the rat nucleus tractus solitarii." *J Comp Neurol* **520**(3): 495-527.
- 332 Dessirier, J. M., M. O'Mahony, M. Iodi-Carstens and E. Carstens (2000). "Sensory properties of  
333 citric acid: psychophysical evidence for sensitization, self-desensitization, cross-desensitization  
334 and cross-stimulus-induced recovery following capsaicin." *Chem Senses* **25**(6): 769-780.
- 335 Deval, E., X. Gasull, J. Noel, M. Salinas, A. Baron, S. Diochot and E. Lingueglia (2010). "Acid-  
336 sensing ion channels (ASICs): pharmacology and implication in pain." *Pharmacol Ther* **128**(3):  
337 549-558.
- 338 Finger, T. E., V. Danilova, J. Barrows, D. L. Bartel, A. J. Vigers, L. Stone, G. Hellekant and S.  
339 C. Kinnamon (2005). "ATP signaling is crucial for communication from taste buds to gustatory  
340 nerves." *Science* **310**(5753): 1495-1499.
- 341 Gerhold, K. A. and D. M. Bautista (2008). "TRPA1: irritant detector of the airways." *J Physiol*  
342 **586**(14): 3303.
- 343 Hallock, R. M., M. Tatangelo, J. Barrows and T. E. Finger (2009). "Residual chemosensory  
344 capabilities in double P2X2/P2X3 purinergic receptor null mice: intraoral or postingestive  
345 detection?" *Chem Senses* **34**(9): 799-808.
- 346 Kichko, T. I., W. Neuhuber, G. Kobal and P. W. Reeh (2018). "The roles of TRPV1, TRPA1 and  
347 TRPM8 channels in chemical and thermal sensitivity of the mouse oral mucosa." *Eur J Neurosci*  
348 **47**(3): 201-210.
- 349 Kim, Y. S., S. K. Kim, J. S. Lee, S. J. Ko and Y. C. Bae (2018). "Expression of vesicular  
350 glutamate transporters in transient receptor potential ankyrin 1 (TRPA1)-positive neurons in the  
351 rat trigeminal ganglion." *Brain Res* **1690**: 31-39.



- 352 Nguyen, M. Q., Y. Wu, L. S. Bonilla, L. J. von Buchholtz and N. J. P. Ryba (2017). "Diversity  
353 amongst trigeminal neurons revealed by high throughput single cell sequencing." PLoS One  
354 **12**(9): e0185543.
- 355 Ohkuri, T., N. Horio, J. M. Stratford, T. E. Finger and Y. Ninomiya (2012). "Residual  
356 chemoresponsiveness to acids in the superior laryngeal nerve in "taste-blind" (P2X2/P2X3  
357 double-KO) mice." Chem Senses **37**(6): 523-532.
- 358 Price, M. P., S. L. McIlwrath, J. Xie, C. Cheng, J. Qiao, D. E. Tarr, K. A. Sluka, T. J. Brennan,  
359 G. R. Lewin and M. J. Welsh (2001). "The DRASIC cation channel contributes to the detection  
360 of cutaneous touch and acid stimuli in mice." Neuron **32**(6): 1071-1083.
- 361 Richter, T. A., A. Caicedo and S. D. Roper (2003). "Sour taste stimuli evoke Ca<sup>2+</sup> and pH  
362 responses in mouse taste cells." J Physiol **547**(Pt 2): 475-483.
- 363 Stratford, J. M. and T. E. Finger (2011). "Central representation of postingestive chemosensory  
364 cues in mice that lack the ability to taste." J Neurosci **31**(25): 9101-9110.
- 365 Stratford, J. M. and J. A. Thompson (2016). "MSG-Evoked c-Fos Activity in the Nucleus of the  
366 Solitary Tract Is Dependent upon Fluid Delivery and Stimulation Parameters." Chemical Senses  
367 **41**(3): 211-220.
- 368 Stratford, J. M., J. A. Thompson and T. E. Finger (2017). "Immunocytochemical organization  
369 and sour taste activation in the rostral nucleus of the solitary tract of mice." J Comp Neurol  
370 **525**(2): 271-290.
- 371 Sudo, S., M. Sudo, C. T. Simons, J. M. Dessirier, M. Iodi Carstens and E. Carstens (2003).  
372 "Activation of neurons in trigeminal caudalis by noxious oral acidic or salt stimuli is not reduced  
373 by amiloride." Brain Res **969**(1-2): 237-243.
- 374 Tominaga, M., M. J. Caterina, A. B. Malmberg, T. A. Rosen, H. Gilbert, K. Skinner, B. E.  
375 Raumann, A. I. Basbaum and D. Julius (1998). "The cloned capsaicin receptor integrates  
376 multiple pain-producing stimuli." Neuron **21**(3): 531-543.
- 377 Vandenbeuch, A., C. B. Anderson, A. P. Ford, S. Smith, T. E. Finger and S. C. Kinnamon  
378 (2013). "A selective P2X3, P2X2/3 receptor antagonist abolishes responses to all taste stimuli  
379 in mice." Chem Senses **38**(Supp): 86.
- 380 Wang, Y. Y., R. B. Chang, S. D. Allgood, W. L. Silver and E. R. Liman (2011). "A TRPA1-  
381 dependent mechanism for the pungent sensation of weak acids." J gen physiol **137**(6): 493-505.
- 382 Wu, P., D. Arris, M. Grayson, C. N. Hung and S. Ruparel (2018). "Characterization of sensory  
383 neuronal subtypes innervating mouse tongue." PLoS One **13**(11): e0207069.
- 384 Zhang, J., H. Jin, W. Zhang, C. Ding, S. O'Keefe, M. Ye and C. S. Zuker (2019). "Sour Sensing  
385 from the Tongue to the Brain." Cell **179**(2): 392-402 e315.

386

387

388

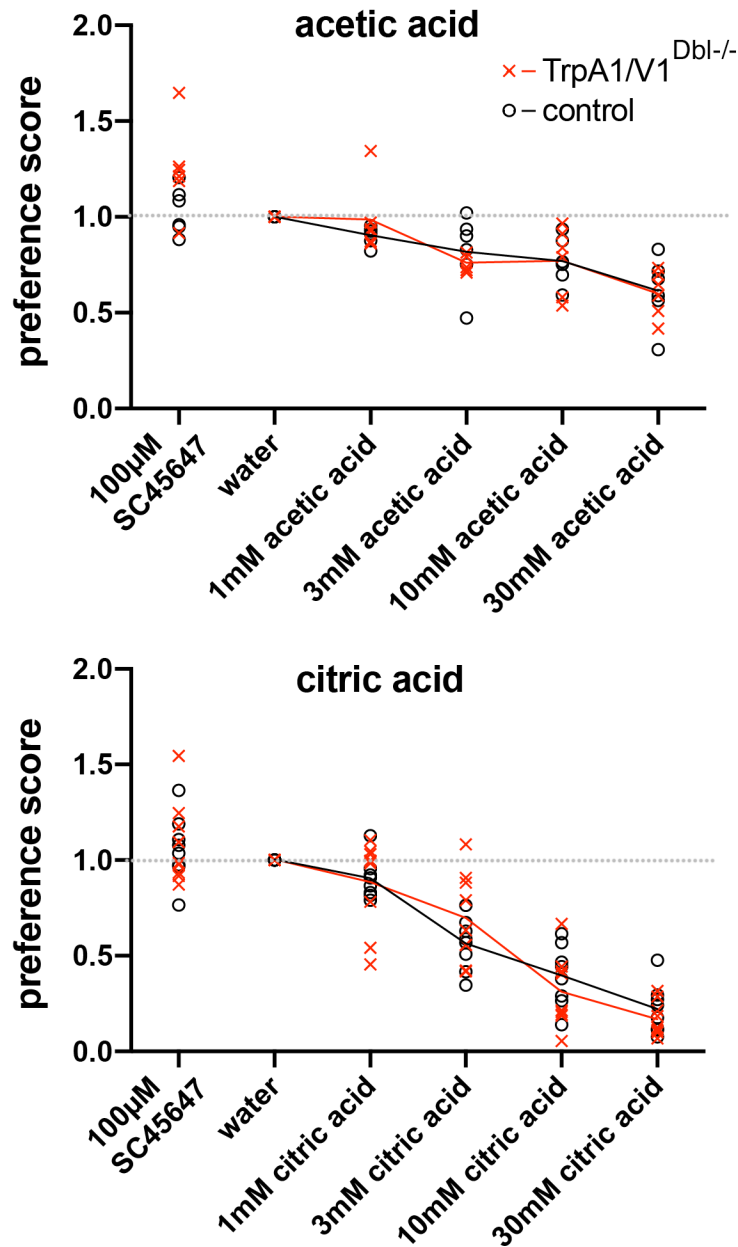

389

390 Fig. 1: Brief access tests showing similar avoidance of citric acid and acetic acid for  
391 TRPA1/V1<sup>Dbl-/-</sup> mice and wildtype controls of the same background. ANOVA shows no  
392 significant difference between the groups. Preference scores represent the average number of  
393 licks relative to those for water. Preference scores higher than 1 indicate a preference for the  
394 taste stimulus, while preference scores lower than 1 indicate an avoidance.

395

396

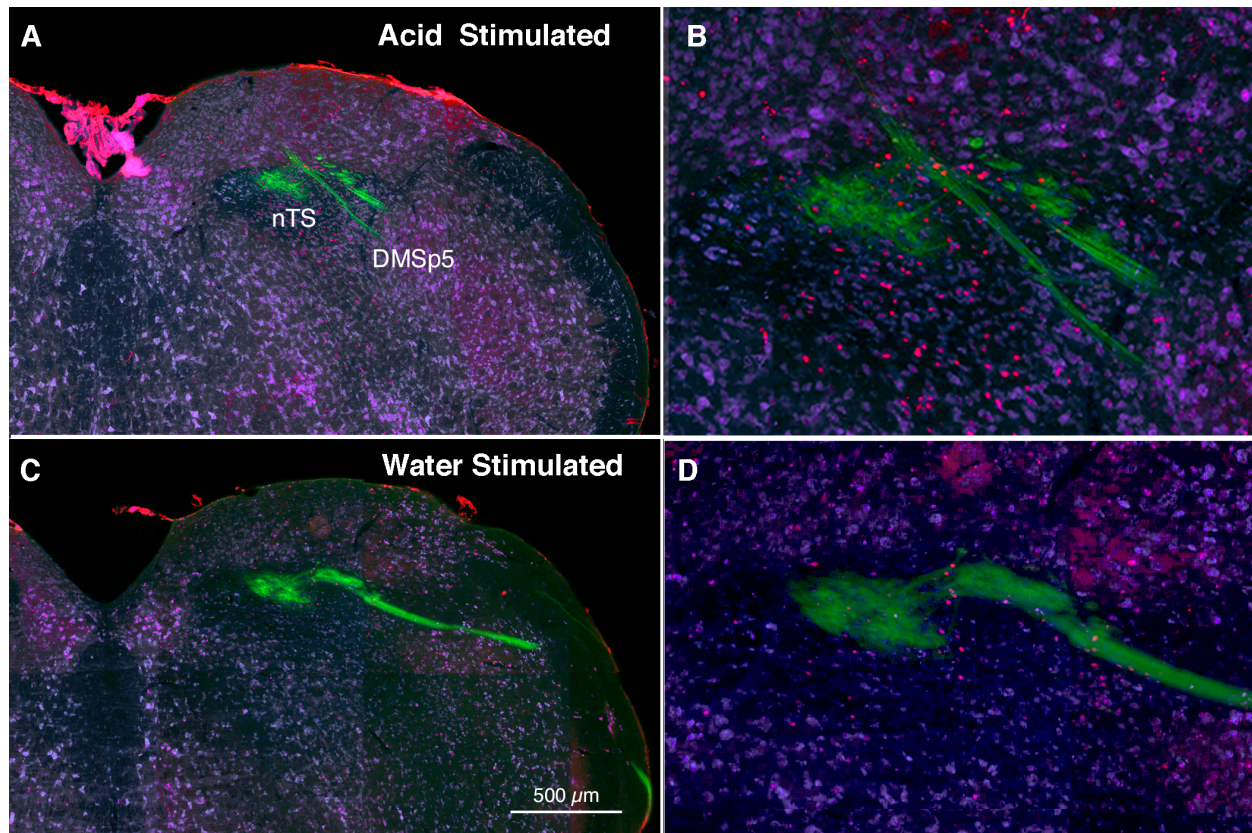

397

398 Fig. 2. C-Fos staining (red dots) in nTS of the TRPA1/V1<sup>Dbl</sup><sup>-/-</sup> mouse at approximately the R3  
399 level comparing a mouse stimulated by 30mM citric acid (A, B) to one stimulated only by water  
400 (C, D). Note the higher number of c-Fos positive cell nuclei (red) in the acid stimulated  
401 compared to the water-stimulated animal. Green staining shows the distribution of P2X3-  
402 immunoreactive fibers which terminate largely in the dorsocentral part of the nTS. Most acid-  
403 stimulated cells lie in the ventral tier of the nucleus and in the DMSp5 region ventrolateral to the  
404 nTS. Blue counterstain from FluoroNissl.

405

## WT Mice

## KO Mice

### Water Stimulated

|    |   | Medial | I    | Lateral | DMSp5 |
|----|---|--------|------|---------|-------|
| r1 | D | 1.5    | 2.3  | 2.3     |       |
|    | V | 2.1    | 2.0  | 1.1     | 2.9   |
| r2 | D | 3.3    | 2.9  | 2.9     |       |
|    | V | 2.1    | 1.0  | 1.9     | 3.0   |
| r3 | D | 5.6    | 12.6 | 9.8     |       |
|    | V | 4.1    | 13.4 | 9.6     | 8.5   |
| r4 | D | 4.3    | 16.6 | 10.9    |       |
|    | V | 4.5    | 14.8 | 12.9    | 10.6  |
| i1 | D | 15.0   | 15.8 | 15.1    |       |
|    | V | 7.3    | 9.5  | 12.1    | 12.3  |
| i2 | D | 11.2   | 14.2 | 7.8     |       |
|    | V | 5.5    | 8.2  | 12.2    | 18.2  |

|    |   | Medial | I    | Lateral | DMSp5 |
|----|---|--------|------|---------|-------|
| r1 | D | 2.3    | 5.0  | 1.9     |       |
|    | V | 1.4    | 0.6  | 0.9     | 2.1   |
| r2 | D | 2.4    | 8.0  | 5.4     |       |
|    | V | 1.6    | 2.6  | 4.0     | 5.1   |
| r3 | D | 4.1    | 10.9 | 3.8     |       |
|    | V | 3.0    | 5.3  | 2.9     | 2.4   |
| r4 | D | 1.6    | 14.3 | 6.5     |       |
|    | V | 1.5    | 11.9 | 4.5     | 5.3   |
| i1 | D | 11.6   | 9.9  | 9.9     |       |
|    | V | 6.1    | 6.8  | 9.2     | 9.1   |
| i2 | D | 9.5    | 8.6  | 4.6     |       |
|    | V | 5.8    | 6.3  | 6.7     | 9.9   |

### Citric Acid Stimulated

|    |   | Medial | I    | Lateral | DMSp5 |
|----|---|--------|------|---------|-------|
| r1 | D | 3.4    | 6.9  | 4.6     |       |
|    | V | 2.9    | 2.3  | 2.6     | 4.9   |
| r2 | D | 4.5    | 9.8  | 3.5     |       |
|    | V | 5.0    | 5.8  | 4.0     | 2.8   |
| r3 | D | 7.0    | 21.4 | 8.1     |       |
|    | V | 5.9    | 18.9 | 12.3    | 11.1  |
| r4 | D | 9.6    | 27.9 | 13.3    |       |
|    | V | 8.3    | 24.6 | 20.3    | 22.6  |
| i1 | D | 22.9   | 31.0 | 13.6    |       |
|    | V | 10.8   | 22.4 | 26.4    | 20.3  |
| i2 | D | 13.3   | 22.9 | 11.6    |       |
|    | V | 9.5    | 16.6 | 28.1    | 26.4  |

|    |   | Medial | I    | Lateral | DMSp5 |
|----|---|--------|------|---------|-------|
| r1 | D | 3.7    | 5.0  | 2.3     |       |
|    | V | 2.4    | 2.8  | 1.7     | 3.4   |
| r2 | D | 5.9    | 13.4 | 5.3     |       |
|    | V | 6.4    | 6.6  | 4.4     | 5.2   |
| r3 | D | 6.2    | 17.2 | 8.3     |       |
|    | V | 6.1    | 19.0 | 11.0    | 6.3   |
| r4 | D | 9.5    | 23.1 | 13.7    |       |
|    | V | 7.0    | 24.8 | 13.4    | 10.9  |
| i1 | D | 10.6   | 22.9 | 18.0    |       |
|    | V | 5.8    | 19.2 | 27.9    | 17.3  |
| i2 | D | 10.0   | 12.3 | 7.5     |       |
|    | V | 8.3    | 15.1 | 22.6    | 17.3  |

### Acid Specific (C.A. - water)

|    |   | Medial | I    | Lateral | DMSp5 |
|----|---|--------|------|---------|-------|
| r1 | D | 1.9    | 4.6  | 2.4     |       |
|    | V | 0.8    | 0.3  | 1.5     | 2.0   |
| r2 | D | 1.3    | 6.9  | 0.6     |       |
|    | V | 2.9    | 4.8  | 2.1     | -0.3  |
| r3 | D | 1.4    | 8.8  | -1.6    |       |
|    | V | 1.8    | 5.5  | 2.6     | 2.6   |
| r4 | D | 5.4    | 11.3 | 2.4     |       |
|    | V | 3.8    | 9.9  | 7.4     | 12.0  |
| i1 | D | 7.9    | 15.3 | -1.5    |       |
|    | V | 3.5    | 12.9 | 14.3    | 8.0   |
| i2 | D | 2.1    | 8.7  | 3.8     |       |
|    | V | 4.0    | 8.5  | 16.0    | 8.2   |

|    |   | Medial | I    | Lateral | DMSp5 |
|----|---|--------|------|---------|-------|
| r1 | D | 1.5    | 0.0  | 0.4     |       |
|    | V | 1.0    | 2.2  | 0.8     | 1.3   |
| r2 | D | 3.5    | 5.4  | -0.1    |       |
|    | V | 4.8    | 4.0  | 0.4     | 0.1   |
| r3 | D | 2.1    | 6.3  | 4.5     |       |
|    | V | 3.1    | 13.7 | 8.1     | 3.9   |
| r4 | D | 7.9    | 8.8  | 7.2     |       |
|    | V | 5.5    | 12.9 | 8.9     | 5.6   |
| i1 | D | -1.0   | 13.0 | 8.1     |       |
|    | V | -0.3   | 12.4 | 18.7    | 8.2   |
| i2 | D | 0.5    | 3.7  | 2.9     |       |
|    | V | 2.5    | 8.8  | 15.9    | 7.4   |

407 Fig. 3. Heat maps of c-Fos expression in nTS and DMSp5 regions comparing wildtype (left) and  
408 TRPA1/V1<sup>Db1-/-</sup> mice, stimulated by intraoral injection of water (top row) and by citric acid  
409 (middle row). Bottom row shows acid-specific activation, i.e. citric acid counts minus the counts  
410 produced by water alone. No significant differences occur either in the pattern or absolute level  
411 of expression across subregions (see text for details). For each panel, the maximum value was  
412 assigned as red; zero was assigned light yellow, and negative values shades of blue.

413

414
